# Supplementary material for: PredLnc-GFStack: A Global Sequence Feature Based on a Stacked Ensemble Learning Method for Predicting lncRNAs from Transcripts
Source: PubMed Central journal article supplement (PMC6770532; doi:10.3390/genes10090672), 2019-09-03
Supplement: genes-10-00672-s001.pdf [file genes-10-00672-s001.pdf]

**Table S1.** The download links of datasets we used

| <b>Datasets</b>                                    | <b>Download Links of Protein-coding transcript sequences</b>                                          | <b>Download Links of Long non-coding RNA transcript sequences</b>                                         |
|----------------------------------------------------|-------------------------------------------------------------------------------------------------------|-----------------------------------------------------------------------------------------------------------|
| human (Homo sapiens) data (Release 29, GRCh38.p12) | ftp://ftp.ebi.ac.uk/pub/databases/gencode/Gencode_human/release_29/gencode.v29.pc_transcripts.fa.gz   | ftp://ftp.ebi.ac.uk/pub/databases/gencode/Gencode_human/release_29/gencode.v29.lncRNA_transcripts.fa.gz   |
| mouse (Mus musculus) data (Release M20, GRCm38.p6) | ftp://ftp.ebi.ac.uk/pub/databases/gencode/Gencode_mouse/release_M20/gencode.vM20.pc_transcripts.fa.gz | ftp://ftp.ebi.ac.uk/pub/databases/gencode/Gencode_mouse/release_M20/gencode.vM20.lncRNA_transcripts.fa.gz |

**Table S2.** The intersections of optimal feature subsets for human and mouse

| <b>Species</b>                                                     | <b>Intersections of optimal feature subsets</b>                        | <b>Descriptions</b>                                                          | <b>Types</b>                |
|--------------------------------------------------------------------|------------------------------------------------------------------------|------------------------------------------------------------------------------|-----------------------------|
| Human                                                              | A_pos_fickett, G_pos_fickett, fickett_score                            | nucleotide position frequencies<br>Fickett TESTCODE score                    | codon-related features      |
|                                                                    | longest_orf_Rlen                                                       | the longest ORF coverage                                                     | ORF-related features        |
|                                                                    | integrity                                                              | whether the longest ORF starts with a start codon and ends with a stop codon |                             |
|                                                                    | EDP_ORF_k_mer_GA, EDP_ORF_k_mer_CG, EDP_ORF_k_mer_CT, EDP_ORF_k_mer_TC | The EDP (entropy density profiles) of ORF                                    |                             |
|                                                                    | transcript_GC                                                          | GC content of transcript                                                     | GC-related features         |
|                                                                    | GC1_frame_score, GC3_frame_score                                       | The variance of GC content among three reading frames                        |                             |
|                                                                    | C1, G1, G2                                                             | CTD features                                                                 | transcript-related features |
|                                                                    | transcript_length                                                      | The length of transcript                                                     |                             |
|                                                                    | hexamer_score                                                          | Features calculated based on in-frame hexamer frequency                      |                             |
|                                                                    | snr                                                                    | Signal to noise ratio (SNR)                                                  |                             |
| EDP_fea_W, EDP_fea_Y                                               | The EDP (entropy density profiles) of transcript                       | k-mer (the frequencies of different matches of                               |                             |
| ACC, C, GCC, GCT, CTG, AAT, GAA, TT, GGA, GTC, CTC, ORF_k_mer_AGT, | k-mer (the frequencies of different matches of                         |                                                                              |                             |

|       |                                                                                                                                                                                                                                                                                                                |                                                                                                                                                        |                                                         |
|-------|----------------------------------------------------------------------------------------------------------------------------------------------------------------------------------------------------------------------------------------------------------------------------------------------------------------|--------------------------------------------------------------------------------------------------------------------------------------------------------|---------------------------------------------------------|
|       | <p>ORF_k_mer_CTA, ORF_k_mer_GA,<br/> ORF_k_mer_CGA,<br/> ORF_k_mer_GAT,<br/> ORF_k_mer_TCG, ORF_k_mer_AAT,<br/> ORF_k_mer_TAT, ORF_k_mer_AA,<br/> ORF_k_mer_CAC, ORF_k_mer_CGT,<br/> ORF_k_mer_AAC, ORF_k_mer_TAC,<br/> ORF_k_mer_CC, ORF_k_mer_GGG,<br/> ORF_k_mer_GTC, ORF_k_mer_ATC,<br/> ORF_k_mer_TAA</p> | <p>the k adjacent bases)<br/> on transcript and<br/> ORF</p>                                                                                           |                                                         |
|       | <p>pI</p>                                                                                                                                                                                                                                                                                                      | <p>The theoretical<br/> isoelectric point of the<br/> predicted peptide</p>                                                                            |                                                         |
|       | <p>PI/Mw</p>                                                                                                                                                                                                                                                                                                   | <p>The log 10<br/> transformed ratio of<br/> pI and Mw<br/> (molecular weight)</p>                                                                     | <p>structure-<br/> related<br/> features</p>            |
|       | <p>pI/Mw_frame_score</p>                                                                                                                                                                                                                                                                                       | <p>pI/Mw value of ORF</p>                                                                                                                              |                                                         |
|       | <p>Gravy</p>                                                                                                                                                                                                                                                                                                   | <p>the grand average of<br/> hydropathicity</p>                                                                                                        |                                                         |
|       | <p>G_pos_fickett</p>                                                                                                                                                                                                                                                                                           | <p>nucleotide position<br/> frequencies</p>                                                                                                            | <p>codon-<br/> related<br/> features</p>                |
|       | <p>STOP_Codon_Count</p>                                                                                                                                                                                                                                                                                        | <p>the number of stop<br/> codons in a transcript<br/> whether the longest<br/> ORF starts with a<br/> start codon and ends<br/> with a stop codon</p> |                                                         |
|       | <p>integrity</p>                                                                                                                                                                                                                                                                                               | <p>The EDP (entropy<br/> density profiles) of<br/> ORF</p>                                                                                             | <p>ORF-related<br/> features</p>                        |
|       | <p>EDP_ORF_k_mer_AG,<br/> EDP_ORF_k_mer_TC</p>                                                                                                                                                                                                                                                                 |                                                                                                                                                        |                                                         |
|       | <p>ORF_frame_score</p>                                                                                                                                                                                                                                                                                         | <p>the variance of ORF<br/> length among ORFs</p>                                                                                                      |                                                         |
| Mouse | <p>GC1_frame_score</p>                                                                                                                                                                                                                                                                                         | <p>The variance of GC<br/> content among three<br/> reading frames</p>                                                                                 | <p>GC-related<br/> features</p>                         |
|       | <p>UTR5_GC_content</p>                                                                                                                                                                                                                                                                                         | <p>the GC content of<br/> untranslated<br/> regions (UTR)</p>                                                                                          |                                                         |
|       | <p>txCdsPredict_score</p>                                                                                                                                                                                                                                                                                      | <p>coding potential of<br/> the transcripts are<br/> calculated by the<br/> program<br/> txCdsPredict</p>                                              | <p>coding<br/> sequence-<br/> related<br/> features</p> |
|       | <p>transcript_length</p>                                                                                                                                                                                                                                                                                       | <p>The length of<br/> transcript</p>                                                                                                                   |                                                         |

|                       |                                                                                                                                                                      |                                                                                            |                             |
|-----------------------|----------------------------------------------------------------------------------------------------------------------------------------------------------------------|--------------------------------------------------------------------------------------------|-----------------------------|
| Human<br>and<br>Mouse | TAT, TGT, TAG, CTG, ATG, TA, GC, AC,<br>CGC, GAT, TG, TTG, AA, TAA,<br>ORF_k_mer_GTG, ORF_k_mer_CG,<br>ORF_k_mer_GAT, ORF_k_mer_CT,<br>ORF_k_mer_AGA, ORF_k_mer_CCA, | k-mer (the frequencies of different matches of the k adjacent bases) on transcript and ORF | transcript-related features |
|                       | snr                                                                                                                                                                  | Signal to noise ratio (SNR)                                                                |                             |
|                       | EDP_fea_A, EDP_fea_W, EDP_fea_L,<br>EDP_fea_C                                                                                                                        | The EDP (entropy density profiles) of transcript                                           |                             |
|                       | pI                                                                                                                                                                   | The theoretical isoelectric point of the predicted peptide                                 | structure-related features  |
|                       | PI/Mw                                                                                                                                                                | The log 10 transformed ratio of pI and Mw (molecular weight)                               |                             |
|                       | G_pos_fickett                                                                                                                                                        | nucleotide position frequencies                                                            | codon-related features      |
|                       | integrity                                                                                                                                                            | whether the longest ORF starts with a start codon and ends with a stop codon               | ORF-related features        |
|                       | EDP_ORF_k_mer_TC                                                                                                                                                     | The EDP (entropy density profiles) of ORF                                                  |                             |
|                       | GC1_frame_score                                                                                                                                                      | The variance of GC content among three reading frames                                      | GC-related features         |
|                       | transcript_length                                                                                                                                                    | The length of transcript                                                                   |                             |
|                       | snr                                                                                                                                                                  | Signal to noise ratio (SNR)                                                                |                             |
|                       | CTG, ORF_k_mer_GAT                                                                                                                                                   | k-mer (the frequencies of different matches of the k adjacent bases) on transcript and ORF | transcript-related features |
| EDP_fea_W             | The EDP (entropy density profiles) of transcript                                                                                                                     |                                                                                            |                             |
| pI                    | The theoretical isoelectric point of the predicted peptide                                                                                                           | structure-related features                                                                 |                             |

| PI/Mw | The log 10 transformed ratio of pI and Mw (molecular weight) |
|-------|--------------------------------------------------------------|
|-------|--------------------------------------------------------------|

**Table S3.** The performance of PredLnc-GFStack on the list of well-known lncRNAs

| LncRNA ID   | LncRNA Name | References | Prediction results |
|-------------|-------------|------------|--------------------|
| NR_130791.1 | lncRNA-JADE | [1]        | lncRNA             |
| NR_144384.1 | DINOL       | [2]        | lncRNA             |
| NR_036469.2 | Linc p21    | [3]        | lncRNA             |
| KT318134.1  | DDSR1       | [4]        | lncRNA             |
| NR_027451.1 | NORAD       | [5]        | lncRNA             |
| NR_038366.1 | HOTAIRM1    | [6]        | lncRNA             |
| NR_024582.1 | Xist        | [7]        | lncRNA             |
| JF519002.1  | Tsix        | [8]        | lncRNA             |
| KX036209.1  | NEAT1       | [9]        | lncRNA             |
| NR_028261.1 | Rian        | [10]       | lncRNA             |
| NR_047517.1 | HOTAIR      | [11]       | lncRNA             |
| NR_045680.1 | HEIH        | [12]       | lncRNA             |
| NR_036484.1 | FEZF1-AS1   | [13]       | lncRNA             |
| NR_046466.1 | MEG3        | [14]       | lncRNA             |
| NR_015379.3 | UCA1        | [15]       | lncRNA             |
| NR_110375.1 | THRIL       | [16]       | lncRNA             |

|             |           |      |        |
|-------------|-----------|------|--------|
| NR_045420.2 | Bvht      | [17] | lncRNA |
| NR_045471.2 | Fendrr    | [18] | lncRNA |
| NR_148381.1 | PNKY      | [19] | lncRNA |
| NR_131221.1 | SPRY4-IT1 | [20] | lncRNA |

**Figure S1.** The importance scores of features in the intersection of optimal subsets for both human. The x-axis means the features in the intersection of optimal subsets for both human and mouse, and y-axis means the importance scores of corresponding features, which is calculated using Sklearn package in Python.

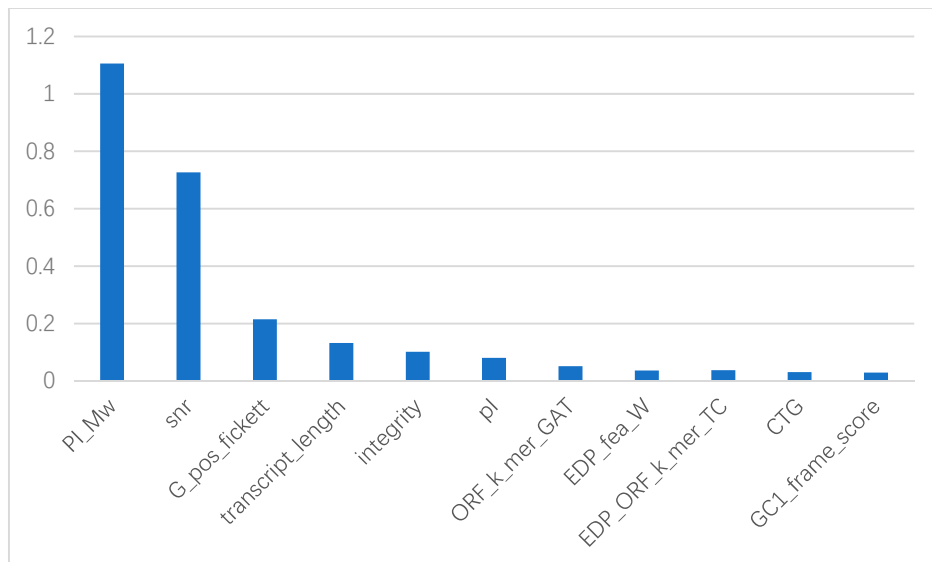

## Reference

1. Wan, G.; Hu, X.; Liu, Y.; Han, C.; Sood, A.K.; Calin, G.A.; Zhang, X.; Lu, X. A novel non-coding RNA lncRNA-JADE connects DNA damage signalling to histone H4 acetylation. *EMBO J* **2013**, *32*, 2833–2847.
2. Schmitt, A.M.; Garcia, J.T.; Hung, T.; Flynn, R.A.; Shen, Y.; Qu, K.; Payumo, A.Y.; Peres-da-Silva, A.; Broz, D.K.; Baum, R. An inducible long noncoding RNA amplifies DNA damage signaling. *Nat Gen* **2016**, *48*, 1370.
3. Xia, W.; Zhuang, L.; Hou, M. Role of lincRNA-p21 in the protective effect of macrophage inhibition factor against hypoxia/serum deprivation-induced apoptosis in mesenchymal stem cells. *Int J Mol Med* **2018**, *42*, 2175–2184.
4. Sharma, V.; Khurana, S.; Kubben, N.; Abdelmohsen, K.; Oberdoerffer, P.; Gorospe, M.; Misteli, T. A *BRCA1*-interacting lncRNA regulates homologous recombination. *EMBO Rep* **2015**, *16*, 1520–1534.
5. Miao, Z.; Guo, X.; Tian, L. The long noncoding RNA NORAD promotes the growth of gastric cancer cells by sponging miR-608. *Gene* **2019**, *687*, 116–124.
6. Xiao, Y.; Yan, X.; Yang, Y.; Ma, X. Downregulation of long noncoding RNA HOTAIRM1 variant 1 contributes to osteoarthritis via regulating miR-125b/BMP2 axis and activating JNK/MAPK/ERK

- pathway. *Biomed Pharmacother* **2019**, *109*, 1569–1577.
7. Lin, X.-q.; Huang, Z.-m.; Chen, X.; Wu, F.; Wu, W. XIST Induced by JPX suppresses hepatocellular carcinoma by sponging miR-155-5p. *Yonsei Med J* **2018**, *59*, 816–826.
  8. Shevchenko, A.I.; Malakhova, A.A.; Elisaphenko, E.A.; Mazurok, N.A.; Nesterova, T.B.; Brockdorff, N.; Zakian, S.M. Variability of sequence surrounding the *Xist* gene in rodents suggests taxon-specific regulation of X chromosome inactivation. *PLoS One* **2011**, *6*, e22771.
  9. Cornelis, G.; Souquere, S.; Vernochet, C.; Heidmann, T.; Pierron, G. Functional conservation of the lncRNA NEAT1 in the ancestrally diverged marsupial lineage: Evidence for NEAT1 expression and associated paraspeckle assembly during late gestation in the opossum *Monodelphis domestica*. *RNA biology* **2016**, *13*, 826–836.
  10. Saito, T.; Hara, S.; Kato, T.; Tamano, M.; Muramatsu, A.; Asahara, H.; Takada, S. A tandem repeat array in IG-DMR is essential for imprinting of paternal allele at the Dlk1–Dio3 domain during embryonic development. *Human molecular genetics* **2018**, *27*, 3283–3292.
  11. Chu, Y.-H.; Hardin, H.; Eickhoff, J.; Lloyd, R.V. In situ hybridization analysis of long non-coding RNAs MALAT1 and HOTAIR in gastroenteropancreatic neuroendocrine neoplasms. *Endocrine pathology* **2019**, *30*, 56–63.
  12. Cui, C.; Zhai, D.; Cai, L.; Duan, Q.; Xie, L.; Yu, J. Long noncoding RNA HEIH promotes colorectal cancer tumorigenesis via counteracting miR-939–mediated transcriptional repression of Bcl-xL. *Cancer Res Treat* **2018**, *50*, 992.
  13. Zhang, Y.; Yang, Q.-X.; Peng, T.-T.; Wang, L.-J.; Xiao, G.-L.; Tang, S.-B. Prognostic value of lncRNA FEZF1 antisense RNA 1 over-expression in oncologic outcomes of patients with solid tumors. *Medicine* **2019**, *98*.
  14. Yan, L.; Liu, Z.; Yin, H.; Guo, Z.; Luo, Q. Silencing of MEG3 inhibited ox-LDL-induced inflammation and apoptosis in macrophages via modulation of the MEG3/miR-204/CDKN2A regulatory axis. *Cell Biol Int* **2019**, *43*, 409–420.
  15. Guo, N.; Sun, Q.; Fu, D.; Zhang, Y. Long non-coding RNA UCA1 promoted the growth of adrenocortical cancer cells via modulating the miR-298-CDK6 axis. *Gene* **2019**, *703*, 26–34.
  16. Wang, Y.; Liu, Y.; Li, Z.; Yan, X.; Huang, C.; Ye, X.; Sun, X.; Qin, S.; Zhong, X.; Zeng, C. Association between MALAT1 and THRIL polymorphisms and precancerous cervical lesions. *Genet Test Mol Biomarkers*. **2018**, *22*, 509–517.
  17. Hou, J.; Long, H.; Zhou, C.; Zheng, S.; Wu, H.; Guo, T.; Wu, Q.; Zhong, T.; Wang, T. Long noncoding RNA Braveheart promotes cardiogenic differentiation of mesenchymal stem cells in vitro. *Stem Cell Res Ther* **2017**, *8*, 4.
  18. Dong, B.; Zhou, B.; Sun, Z.; Huang, S.; Han, L.; Nie, H.; Chen, G.; Liu, S.; Zhang, Y.; Bao, N. LncRNA-FENDRR mediates VEGFA to promote the apoptosis of brain microvascular endothelial cells via regulating miR-126 in mice with hypertensive intracerebral hemorrhage. *Microcirculation* **2018**, *25*, e12499.
  19. Ramos, A.D.; Andersen, R.E.; Liu, S.J.; Nowakowski, T.J.; Hong, S.J.; Gertz, C.C.; Salinas, R.D.; Zarabi, H.; Kriegstein, A.R.; Lim, D.A. The long noncoding RNA Pnky regulates neuronal differentiation of embryonic and postnatal neural stem cells. *Cell stem cell* **2015**, *16*, 439–447.
  20. Wu, H.; Wang, Y.; Chen, T.; Li, Y.; Wang, H.; Zhang, L.; Chen, S.; Wang, W.; Yang, Q.; Chen, C. The N-terminal polypeptide derived from vMIP-II exerts its anti-tumor activity in human breast cancer by regulating lncRNA SPRY4-IT1. *Biosci Rep* **2018**, *38*, BSR20180411.

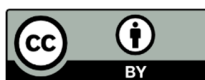

© 2019 by the authors. Submitted for possible open access publication under the terms and conditions of the Creative Commons Attribution (CC BY) license (<http://creativecommons.org/licenses/by/4.0/>).
